# Supplementary material for: Patterns of Human Milk Oligosaccharides in Mature Milk Are Associated with Certain Gut Microbiota in Infants
Source: MDPI journal article supplement (doi:10.3390/nu16091287), 2024-04-25
Supplement: s1 [file s1]

**Supplemental Table S1.** Association between maternal secretor phenotype and commensal bacteria  $\beta$ (95%CI) <sup>a</sup>

| Species                           | Crude model            | Model 1                 |
|-----------------------------------|------------------------|-------------------------|
| <i>Klebsiella pneumoniae</i>      | 0.015 (-0.190, 0.220)  | 0.101 (-0.094, 0.297)   |
| <i>Escherichia coli</i>           | -0.068 (-0.273, 0.136) | -0.111 (-0.328, 0.107)  |
| <i>Clostridium perfringens</i>    | 0.086 (-0.118, 0.290)  | 0.137 (-0.073, 0.347)   |
| <i>Bacteroides fragilis</i>       | 0.154 (-0.049, 0.356)  | 0.158 (-0.046, 0.363)   |
| <i>Clostridium neonatale</i>      | -0.161 (-0.363, 0.041) | -0.059 (-0.246, 0.129)  |
| <i>Streptococcus salivarius</i>   | 0.034 (-0.171, 0.238)  | 0.085 (-0.136, 0.306)   |
| <i>Klebsiella oxytoca</i>         | 0.041 (-0.163, 0.246)  | -0.017 (-0.233, 0.200)  |
| <i>Clostridium butyricum</i>      | -0.028 (-0.233, 0.177) | 0.020 (-0.207, 0.248)   |
| <i>Clostridium tertium</i>        | -0.050 (-0.255, 0.154) | -0.035 (-0.252, 0.182)  |
| <i>Veillonella parvula</i>        | 0.004 (-0.201, 0.209)  | -0.004 (-0.231, 0.223)  |
| <i>Citrobacter freundii</i>       | 0.045 (-0.159, 0.250)  | 0.059 (-0.165, 0.282)   |
| <i>Haemophilus parainfluenzae</i> | -0.007 (-0.212, 0.198) | 0.020 (-0.206, 0.247)   |
| <i>Veillonella dispar</i>         | 0.013 (-0.192, 0.217)  | -0.07 (-0.293, 0.154)   |
| <i>Parabacteroides distasonis</i> | -0.117 (-0.321, 0.086) | -0.222 (-0.431, -0.012) |
| <i>Enterobacter aerogenes</i>     | 0.126 (-0.077, 0.329)  | 0.098 (-0.128, 0.324)   |

Top 15 most abundant infant gut microbiota except for *Bifidobacterium* and *Lactobacilli* were explored. Crude model: only maternal secretor phenotype was included. Model 1: Adjusted for city (Chengdu, Guangzhou, Hohhot, Beijing, Suzhou), maternal age ( $\leq 30$  y or  $> 30$ y), total concentration of HMOs (mg/L), and deliver mode (vaginal delivery or caesarean section). a: results of linear regression with nSe mothers as reference, the relative abundance of infant gut microbiota was transformed in the form of  $\lg(X+1)$ .

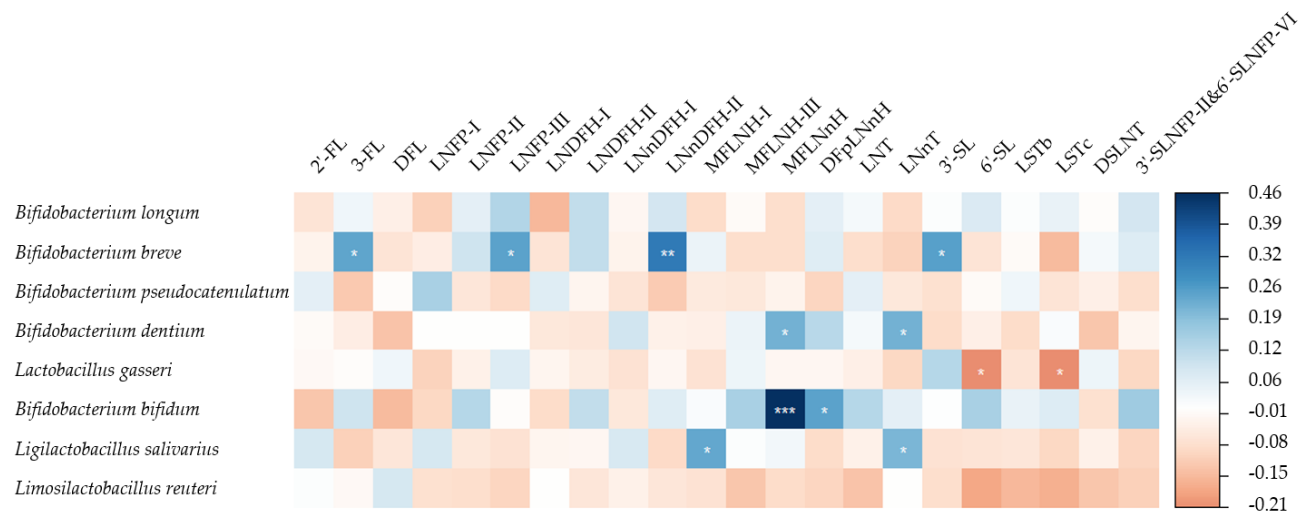

**Supplemental Figure S1.** Standardised coefficients between individual HMOs concentrations and relative abundance of *Bifidobacterium* and *Lactobacilli* in crude model. \*: P < 0.05, \*\*: P < 0.01, \*\*\*: P < 0.001. Top 8 most abundant infant gut microbiota from *Bifidobacterium* and *Lactobacilli* were explored. Only individual HMOs concentration was included. The relative abundance of infant gut microbiota was transformed in the form of  $\lg(X+1)$ . 2'-FL: 2'-fucosyllactose, 3-FL: 3-fucosyllactose, DFL: difucosyllactose, LNFP-I: lacto-N-fucopentaose I, LNFP-II: lacto-N-fucopentaose II, LNFP-III: lacto-N-fucopentaose III,

LNDFH-I: lacto-N-difucohexaose I, LNDFH-II: lacto-N-difucohexaose II, LNnDFH-I: lacto-N-neodifucohexaose I, LNnDFH-II: lacto-N-neodifucohexaose II, MFLNH-I: monofu-cosyl-lacto-N-hexaose I, MFLNH-III: monofucosyl-lacto-N-hexaose III, MFLNnH: monofucosyl-lacto-N-neohexaose, DFpLNnH: difucosyl-para-lacto-N-neohexaose, LNT: lac-to-N-tetraose, LNnT: lacto-N-neotetraose, 3'-SL: 3'-sialyllactose, 6'-SL: 6'-sialyllactose, LSTb: sialyllacto-N-tetraose b, LSTc: sialyllacto-N-tetraose c, DSLNT: disialyllac-to-N-tetraose, 3'-SLNFP-II: 3-sialyl-latco-N-fucopentaose II, 6'-SLNFP-VI: 6-sialyl-latco-N-fucopentaose VI, Sum: total concentration of the HMOs detected.

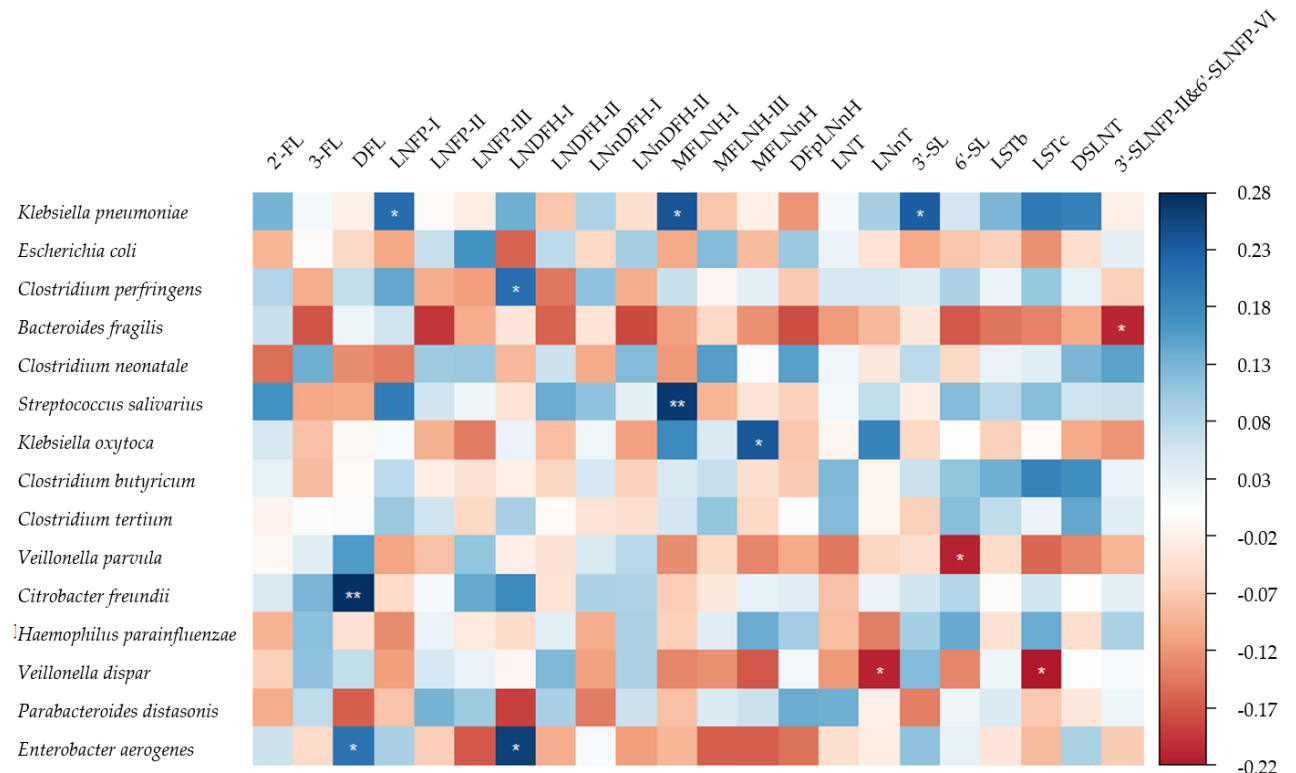

**Supplemental Figure S2.** Standardised coefficients between individual HMOs concentrations and relative abundance of commensal bacteria. \*:  $P < 0.05$ , \*\*:  $P < 0.01$ , \*\*\*:  $P < 0.001$ . Top 15 most abundant infant gut microbiota except for *Bifidobacterium* and *Lactobacilli* were explored. Only individual HMOs concentration was included. The relative abundance of infant gut microbiota was transformed in the form of  $\lg(X+1)$ . 2'-FL: 2'-fucosyllactose, 3'-FL: 3-fucosyllactose, DFL: difucosyllactose, LNFP-I: lacto-N-fucopentaose I, LNFP-II: lacto-N-fucopentaose II, LNFP-III: lacto-N-fucopentaose III, LNDFH-I: lacto-N-difucohexaose I, LNDFH-II: lacto-N-difucohexaose II, LNnDFH-I: lacto-N-neodifucohexaose I, LNnDFH-II: lacto-N-neodifucohexaose II, MFLNH-I: monofu-cosyl-lacto-N-hexaose I, MFLNH-III: monofucosyl-lacto-N-hexaose III, MFLNnH: monofucosyl-lacto-N-neohexaose, DFpLNnH: difucosyl-para-lacto-N-neohexaose, LNT: lac-to-N-tetraose, LNnT: lacto-N-neotetraose, 3'-SL: 3'-sialyllactose, 6'-SL: 6'-sialyllactose, LSTb: sialyllacto-N-tetraose b, LSTc: sialyllacto-N-tetraose c, DSLNT: disialyllac-to-N-tetraose, 3'-SLNFP-II: 3-sialyl-latco-N-fucopentaose II, 6'-SLNFP-VI: 6-sialyl-latco-N-fucopentaose VI, Sum: total concentration of the HMOs detected.

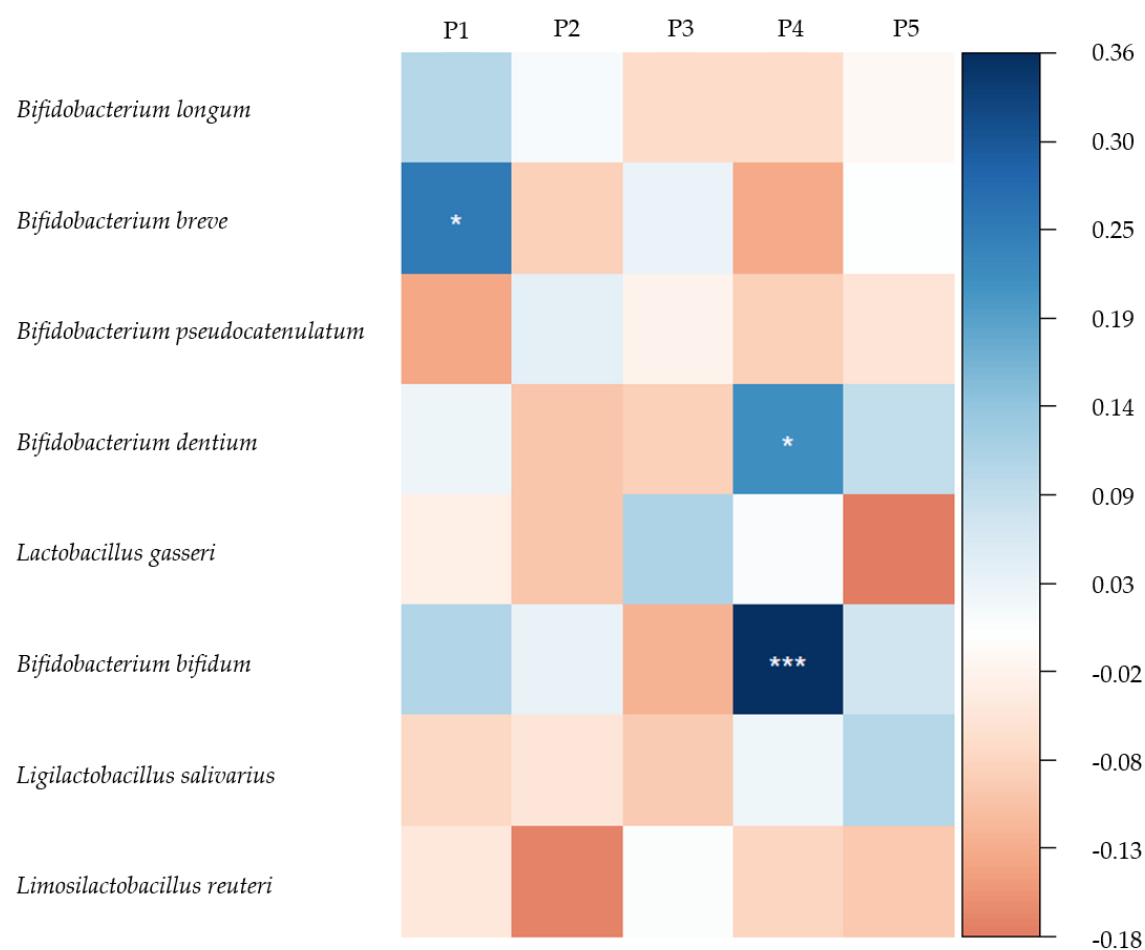

**Supplemental Figure S3.** Standardised coefficients between HMOs pattern scores and relative abundance of *Bifidobacterium* and *Lactobacilli* in crude model. \*:  $P < 0.05$ , \*\*:  $P < 0.01$ , \*\*\*:  $P < 0.001$ . Top 8 most abundant infant gut microbiota from *Bifidobacterium* and *Lactobacilli* were explored. Only HMOs pattern score was included. The relative abundance of infant gut microbiota was transformed in the form of  $\lg(X+1)$ .

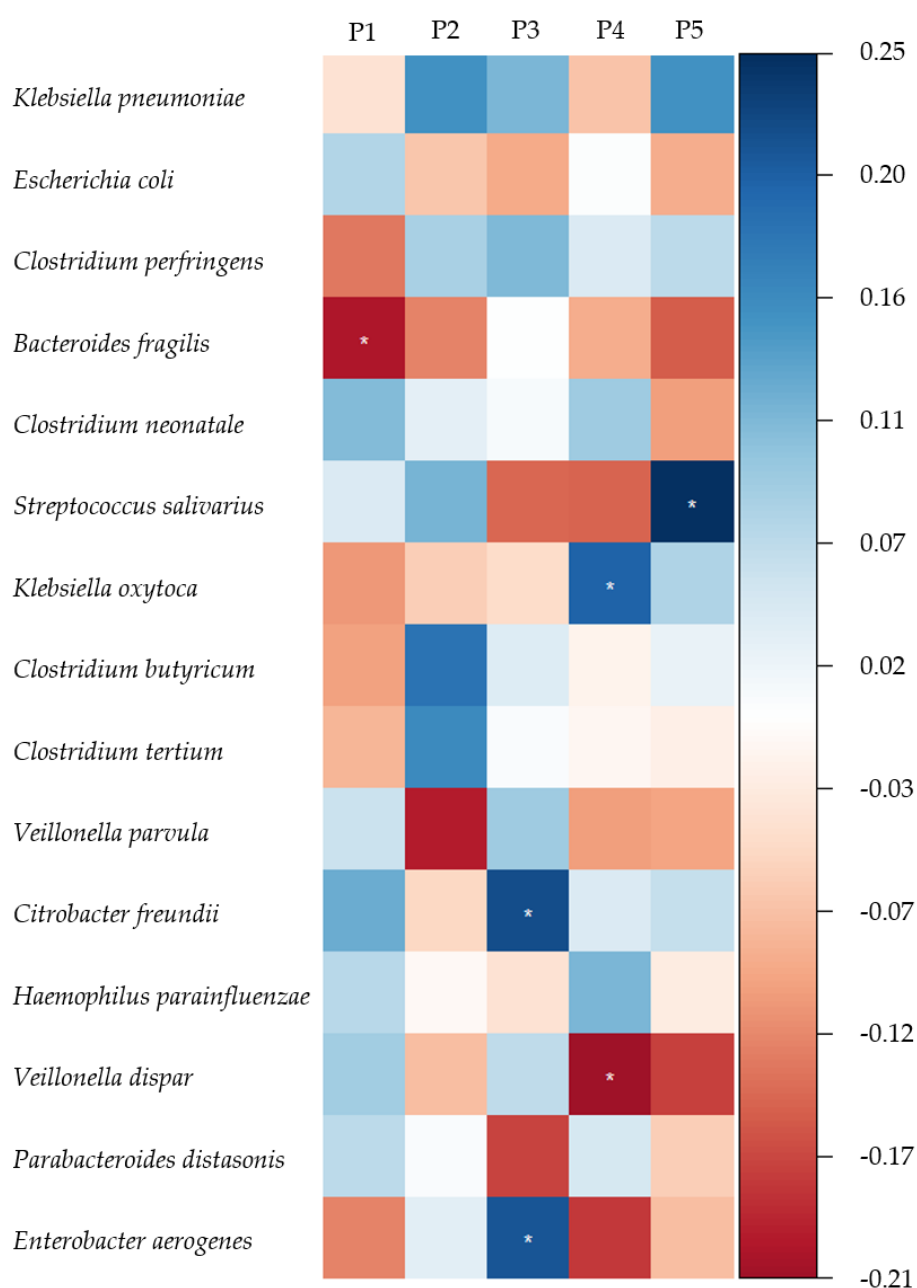

**Supplemental Figure S4.** Standardised coefficients between HMOs pattern scores and relative abundance of commensal bacteria. \*:  $P < 0.05$ , \*\*:  $P < 0.01$ , \*\*\*:  $P < 0.001$ . Top 15 most abundant infant gut microbiota except for *Bifidobacterium* and *Lactobacilli* were explored. Only HMOs pattern score was included. The relative abundance of infant gut microbiota was transformed in the form of  $\lg(X+1)$ .
